# Supplementary material
Source: MDPI journal article supplement (https://www.mdpi.com/2073-4441/14/13/2138)
Supplement: s1 [file s1]

### **Close caption**

**Figure 1.** Location map of the study area. A) Mexico; B) San Luis Potosi State and C) San Luis Potosi Basin

**Figure 2.** Conceptual cross-section model of the SLPB aquifer system. Adapted from Hernández-Constantino (2020) [43]

**Figure 3.** Methodology of this work

**Figure 4.** Geology map of the San Luis Potosi Basin

**Figure 5.** Slope map of the San Luis Potosi Basin

**Figure 6.** Lineament Density (LD) map of the San Luis Potosi Basin

**Figure 7.** Drainage Density (D) map of the San Luis Potosi Basin

**Figure 8.** Rainfall map of the San Luis Potosi Basin

**Figure 9.** Land Use and Land Cover of the San Luis Potosi Basin

**Figure 10.** Topographic Wetness Index of the San Luis Potosi Basin

**Figure 11.** Groundwater Potential Zones Map of the San Luis Potosi Basin

**Figure 12.** Receiver Operating Characteristic (ROC) curve for groundwater potential map validation
