# Supplementary material
Source: MDPI journal article supplement (https://www.mdpi.com/2073-4441/14/13/2138)
Supplement: s1 [file s1]

## Delineation of Potential Groundwater Zones (GWPZ) in a semi-arid basin through remote sensing, GIS and AHP approaches

José Luis Uc Castillo, Diego Armando Martínez Cruz, José Alfredo Ramos Leal, José Tuxpan Vargas, Silvia Alicia Rodríguez Tapia and Ana Elizabeth Marín Celestino

**Table S1.** Parameters selected in other studies for the determination of Groundwater Potential Zones (GWPZ's)

| Study                          | Parameters selected                                                                                                                                                                     |
|--------------------------------|-----------------------------------------------------------------------------------------------------------------------------------------------------------------------------------------|
| Jaiswal et al. (2003) [1]      | Lithology, landforms, soil, land use/land cover, lineaments, surface water bodies, drainage density and slope                                                                           |
| Suganthi et al. (2013) [2]     | Geology, geomorphology, soil, lineament density, rainfall, drainage density, land use/land cover                                                                                        |
| Manap et al. (2013) [3]        | Lithology, slope, lineament, land use/land cover, soil, rainfall, drainage density, elevation and geomorphology                                                                         |
| Rajaveni et al. (2017) [4]     | Slope, Drainage density, geology, lineament density, geomorphology and land use                                                                                                         |
| Arulbalaji et al. (2019) [5]   | Geology, geomorphology, land use/land cover, lineament density, drainage density, rainfall, soil, slope, roughness, topographic wetness index, topographic position Index and curvature |
| Rejith et al. (2019) [6]       | Slope, drainage density, lineament density, land use, curvature, geology, geomorphology, soil and rainfall                                                                              |
| Roy et al. (2020) [7]          | Geomorphology, slope, lineament density, drainage density, land use/land cover                                                                                                          |
| Saranya & Saravanan (2020) [8] | Geomorphology, Drainage density, lineament density, slope, geology, soil, land use/land cover, rainfall, elevation                                                                      |
| Abdelouhed et al. (2021) [9]   | Lineament density, drainage density, rock type, slope, precipitation, land use and Topographic Moisture Index (TWI)                                                                     |
| Doke et al. (2021) [10]        | Geology, distance from river, geomorphology, slope, land use, drainage density, lineament density, soil and rainfall                                                                    |
| Al-Djazouli et al. (2021) [11] | Rainfall, slope, land use/land cover, drainage density, lineament density, and lithology                                                                                                |
| Makonyo & Msabi (2021) [12]    | Lithology, slopes, land use/land cover, soil types, drainage density, geological lineament density, flow accumulation, and topographic wetness index (TWI)                              |
| Kom et al. (2022) [13]         | Geomorphology, geology, lineament density, land use, soil, drainage density, rainfall, slope, curvature and Topographic Wetness Index (TWI)                                             |

|                              |                                                                                                                                                     |
|------------------------------|-----------------------------------------------------------------------------------------------------------------------------------------------------|
| Melese and Belay (2022) [14] | Drainage density, lineament density, slope, land use land cover, soil, rainfall, geology and topographic wetness index (TWI)                        |
| Ifediegwu (2022) [15]        | Geology, rainfall, geomorphology, slope, drainage density, soil, land use/land cover, lineament density                                             |
| Khan et al. (2022) [16]      | Geomorphology, geology, lineaments density, slope, drainage density, and rainfall                                                                   |
| Kumar et al. (2022) [17]     | Lithology, soil, slope, geology, rainfall, drainage density, and land use/land cover                                                                |
| Masoud et al. (2022) [18]    | Hydraulic conductivity, distance from the Lake, lineament density, surface lithology, slope, topography, drainage density, and depth to groundwater |

Table S1 (Continued)

**Table S2.** Slope (degree) classification based on the SOTER model (Van Engelen and Wen, 1995) [19]

| Slope (°) | Description      | Groundwater Potential |
|-----------|------------------|-----------------------|
| <2        | Flat             | Very high             |
| 2-8       | Undulating       | High                  |
| 8-15      | Rolling          | Moderate              |
| 15-30     | Moderately steep | Low                   |
| >30       | Steep            | Very low              |

**Table S3.** Calculation matrix for  $\lambda_{max}$

| Variable          | Geology | Slope | LD    | DD    | Rainfall | LULC  | TWI   | Weight sum value | Variable weight | $\lambda$    |
|-------------------|---------|-------|-------|-------|----------|-------|-------|------------------|-----------------|--------------|
| Geology           | 0.366   | 0.466 | 0.437 | 0.436 | 0.533    | 0.356 | 0.234 | 2.827            | 0.366           | <b>7.728</b> |
| Slope             | 0.183   | 0.233 | 0.437 | 0.218 | 0.304    | 0.223 | 0.208 | 1.805            | 0.233           | <b>7.753</b> |
| Lineament Density | 0.122   | 0.078 | 0.146 | 0.218 | 0.381    | 0.134 | 0.104 | 1.181            | 0.146           | <b>8.117</b> |
| Drainage Density  | 0.091   | 0.116 | 0.073 | 0.109 | 0.228    | 0.134 | 0.104 | 0.856            | 0.109           | <b>7.841</b> |
| Rainfall          | 0.052   | 0.058 | 0.029 | 0.036 | 0.076    | 0.178 | 0.130 | 0.560            | 0.076           | <b>7.356</b> |
| LULC              | 0.046   | 0.047 | 0.049 | 0.036 | 0.019    | 0.045 | 0.078 | 0.319            | 0.045           | <b>7.159</b> |
| TWI               | 0.041   | 0.029 | 0.036 | 0.027 | 0.015    | 0.015 | 0.026 | 0.189            | 0.026           | <b>7.296</b> |

$\lambda_{max} = 7.607$

## References

1. Jaiswal, R.K.; Mukherjee, S.; Krishnamurthy, J.; Saxena, R. Role of remote sensing and GIS techniques for generation of groundwater prospect zones towards rural development - An approach. *Int. J. Remote Sens.* **2003**, *24*, 993–1008, doi:10.1080/01431160210144543.
2. Suganthi, S.; Elango, L.; Subramanian, S.K. Groundwater potential zonation by remote sensing and GIS techniques and its relation to the groundwater level in the coastal part of the Arani and Koratalai river basin, Southern India. *Earth Sci. Res. J.* **2013**, *17*, 87–95.
3. Manap, M.A.; Sulaiman, W.N.A.; Ramli, M.F.; Pradhan, B.; Surip, N. A knowledge-driven GIS modeling technique for groundwater potential mapping at the Upper Langat Basin, Malaysia. *Arab. J. Geosci.* **2013**, *6*, 1621–1637, doi:10.1007/s12517-011-0469-2.
4. Rajaveni, S.P.; Brindha, K.; Elango, L. Geological and geomorphological controls on groundwater occurrence in a hard rock region. *Appl. Water Sci.* **2017**, *7*, 1377–1389, doi:10.1007/s13201-015-0327-6.
5. Arulbalaji, P.; Padmalal, D.; Sreelash, K. GIS and AHP Techniques Based Delineation of Groundwater Potential Zones: a case study from Southern Western Ghats, India. *Sci. Rep.* **2019**, *9*, 1–17, doi:10.1038/s41598-019-38567-x.
6. Rejith, R.G.; Anirudhan, S.; Sundararajan, M. Delineation of groundwater potential zones in hard rock terrain using integrated remote sensing, GIS and MCDM techniques: A case study from vamanapuram river basin, Kerala, India. In *GIS and Geostatistical Techniques for Groundwater Science*; Elsevier Inc., 2019; pp. 349–364 ISBN 9780128154137.
7. Roy, S.; Hazra, S.; Chanda, A.; Das, S. Assessment of groundwater potential zones using multi-criteria decision-making technique: a micro-level case study from red and lateritic zone (RLZ) of West Bengal, India. *Sustain. Water Resour. Manag.* **2020**, *6*, 1–14, doi:10.1007/s40899-020-00373-z.
8. Saranya, T.; Saravanan, S. Groundwater potential zone mapping using analytical hierarchy process (AHP) and GIS for Kancheepuram District, Tamilnadu, India. *Model. Earth Syst. Environ.* **2020**, *6*, 1105–1122, doi:10.1007/s40808-020-00744-7.
9. Abdelouhed, F.; Ahmed, A.; Abdellah, A.; Yassine, B.; Mohammed, I. Using GIS and remote sensing for the mapping of potential groundwater zones in fractured environments in the CHAOUIA-Morocco area. *Remote Sens. Appl. Soc. Environ.* **2021**, *23*, 100571, doi:10.1016/j.rsase.2021.100571.
10. Doke, A.B.; Zolekar, R.B.; Patel, H.; Das, S. Geospatial mapping of groundwater potential zones using multi-criteria decision-making AHP approach in a hardrock basaltic terrain in India. *Ecol. Indic.* **2021**, *127*, 107685, doi:10.1016/j.ecolind.2021.107685.
11. Al-Djazouli, M.O.; Elmorabiti, K.; Rahimi, A.; Amellah, O.; Fadil, O.A.M. Delineating of groundwater potential zones based on remote sensing, GIS and analytical hierarchical process: a case of Waddai, eastern Chad. *GeoJournal* **2021**, *86*, 1881–1894, doi:10.1007/s10708-020-10160-0.
12. Makonyo, M.; Msabi, M.M. Identification of groundwater potential recharge zones using GIS-based multi-criteria decision analysis: A case study of semi-arid midlands Manyara fractured aquifer, North-Eastern Tanzania. *Remote Sens. Appl. Soc. Environ.* **2021**, *23*, doi:10.1016/j.rsase.2021.100544.
13. Kom, K.P.; Gurugnanam, B.; Sunitha, V. Delineation of groundwater potential zones using GIS and AHP techniques in Coimbatore district, South India. *Int. J. Energy Water Resour.* **2022**, doi:10.1007/s42108-022-00188-y.

14. Melese, T.; Belay, T. Groundwater Potential Zone Mapping Using Analytical Hierarchy Process and GIS in Muga Watershed, Abay Basin, Ethiopia. *Glob. Challenges* **2022**, *6*, 1–13, doi:10.1002/gch2.202100068.
15. Ifediegwu, S.I. Assessment of groundwater potential zones using GIS and AHP techniques: a case study of the Lafia district, Nasarawa State, Nigeria. *Appl. Water Sci.* **2022**, *12*, 1–17, doi:10.1007/s13201-021-01556-5.
16. Khan, M.Y.A.; ElKashouty, M.; Tian, F. Mapping Groundwater Potential Zones Using Analytical Hierarchical Process and Multicriteria Evaluation in the Central Eastern Desert, Egypt. *Water* **2022**, *14*, 1041, doi:10.3390/w14071041.
17. Kumar, M.; Singh, S.K.; Kundu, A.; Tyagi, K.; Menon, J.; Frederick, A.; Raj, A.; Lal, D. GIS-based multi-criteria approach to delineate groundwater prospect zone and its sensitivity analysis. *Appl. Water Sci.* **2022**, *12*, 1–14, doi:10.1007/s13201-022-01585-8.
18. Masoud, A.M.; Pham, Q.B.; Alezabawy, A.K.; Abu El-Magd, S.A. Efficiency of Geospatial Technology and Multi-Criteria Decision Analysis for Groundwater Potential Mapping in a Semi-Arid Region. *Water (Switzerland)* **2022**, *14*, doi:10.3390/w14060882.
19. Van Engelen, V.W.; Wen, T.T. *Global and national soils and terrain digital databases (SOTER). Procedures Manual*; Van Engelen, V.W., Wen, T.T., Eds.; International Soil Reference and Information Centre: Wageningen, Netherlands, 1995; ISBN 90-6672-059-X.
