# Supplementary material
Source: MDPI journal article supplement (https://www.mdpi.com/2073-4441/14/13/2138)
Supplement: s1 [file s1]

### **Highlights**

- Groundwater Potential Zones in a semi-arid basin delineated.
- Combined use of Remote Sensing, GIS and Multi-Criteria Decision Making aid to a better knowledge of groundwater resources.
- 68.21% of the basin area is under low groundwater potential conditions.
- Geology and slope are the main variables that controls groundwater occurrence.
