# Supplementary material
Source: MDPI journal article supplement (https://www.mdpi.com/2073-4441/14/13/2138)
Supplement: s1 [file s1]

Archive with 3 entries (3 files):
- CloseCaption.pdf
- Highlights.pdf
- Supplementary_Tables.pdf
